# Supplementary material for: Straight-Parallel Electrodes and Variable Gap for Hydrogen and Oxygen Evolution Reactions
Source: Hindawi journal article supplement (doi:10.1155/2019/5392452), 2019-08-01
Supplement: f1 [file 5392452.f1.pdf]

## Supplementary Material

Below are presented the results obtained from all the experiments carried out. Once the device is connected to the DC Power Supply, a potential difference sweep is carried out from 0 to 3 V and the current is recorded from every distance between electrodes studied, every 30 seconds.

Current results, for the distance between electrodes of 10.65 millimetres:

| Potential Difference (V) | Experiment I Current (A) | Experiment II Current (A) | Experiment III Current (A) |
|--------------------------|--------------------------|---------------------------|----------------------------|
| 0,0                      | 0,0                      | 0,0                       | 0,0                        |
| 0,5                      | 0,0                      | 0,0                       | 0,0                        |
| 1,0                      | 0,0                      | 0,0                       | 0,0                        |
| 1,5                      | 0,0                      | 0,0                       | 0,0                        |
| 1,7                      | 0,0                      | 0,0                       | 0,0                        |
| 1,8                      | 0,27                     | 0,29                      | 0,29                       |
| 1,9                      | 0,69                     | 0,71                      | 0,70                       |
| 2,0                      | 1,28                     | 1,26                      | 1,29                       |
| 2,1                      | 1,98                     | 1,93                      | 1,96                       |
| 2,2                      | 2,76                     | 2,66                      | 2,69                       |
| 2,3                      | 3,57                     | 3,41                      | 3,46                       |
| 2,4                      | 4,41                     | 4,17                      | 4,24                       |
| 2,5                      | 5,26                     | 4,96                      | 5,05                       |
| 2,6                      | 6,13                     | 5,79                      | 5,86                       |
| 2,7                      | 6,98                     | 6,62                      | 6,69                       |
| 2,8                      | 7,90                     | 7,45                      | 7,50                       |
| 2,9                      | 8,79                     | 8,30                      | 8,35                       |
| 3,0                      | 9,69                     | 9,16                      | 9,18                       |

Results obtained with straight parallel electrodes considering a distance between them of 10.65 mm (from the positive electrode to the membrane 3.65 mm and from the negative electrode to the membrane 6 mm) at the initial working temperature of 30.1°C).

Current results, for the distance between electrodes of 9.20 millimetres:

| Potential Difference (V) | Experiment I Current (A) | Experiment II Current (A) | Experiment III Current (A) |
|--------------------------|--------------------------|---------------------------|----------------------------|
| 0,0                      | 0,0                      | 0,0                       | 0,0                        |
| 0,5                      | 0,0                      | 0,0                       | 0,0                        |
| 1,0                      | 0,0                      | 0,0                       | 0,0                        |
| 1,5                      | 0,0                      | 0,0                       | 0,0                        |
| 1,7                      | 0,0                      | 0,0                       | 0,0                        |
| 1,8                      | 0,28                     | 0,30                      | 0,29                       |
| 1,9                      | 0,71                     | 0,77                      | 0,73                       |
| 2,0                      | 1,30                     | 1,38                      | 1,36                       |
| 2,1                      | 2,01                     | 2,13                      | 2,07                       |
| 2,2                      | 2,77                     | 2,97                      | 2,83                       |
| 2,3                      | 3,57                     | 3,85                      | 3,68                       |
| 2,4                      | 4,39                     | 4,74                      | 4,53                       |
| 2,5                      | 5,23                     | 5,60                      | 5,43                       |
| 2,6                      | 6,07                     | 6,52                      | 6,30                       |

|            |      |       |      |
|------------|------|-------|------|
| <b>2,7</b> | 6,93 | 7,43  | 7,17 |
| <b>2,8</b> | 7,77 | 8,37  | 8,05 |
| <b>2,9</b> | 8,63 | 9,27  | 8,92 |
| <b>3,0</b> | 9,50 | 10,19 | 9,81 |

Results obtained with straight parallel electrodes considering a distance between them of 9.20 mm (from the positive electrode to the membrane 2.7 mm and from the negative electrode to the membrane 5.5 mm) at the initial working temperature of 30.1°C).

Current results, for the distance between electrodes of 8.25 millimetres:

| <b>Potential Difference (V)</b> | <b>Experiment I Current (A)</b> | <b>Experiment II Current (A)</b> | <b>Experiment III Current (A)</b> |
|---------------------------------|---------------------------------|----------------------------------|-----------------------------------|
| <b>0,0</b>                      | 0,0                             | 0,0                              | 0,0                               |
| <b>0,5</b>                      | 0,0                             | 0,0                              | 0,0                               |
| <b>1,0</b>                      | 0,0                             | 0,0                              | 0,0                               |
| <b>1,5</b>                      | 0,0                             | 0,0                              | 0,0                               |
| <b>1,7</b>                      | 0,0                             | 0,0                              | 0,0                               |
| <b>1,8</b>                      | 0,25                            | 0,29                             | 0,29                              |
| <b>1,9</b>                      | 0,67                            | 0,77                             | 0,74                              |
| <b>2,0</b>                      | 1,31                            | 1,44                             | 1,40                              |
| <b>2,1</b>                      | 2,09                            | 2,21                             | 2,14                              |
| <b>2,2</b>                      | 2,92                            | 2,99                             | 2,97                              |
| <b>2,3</b>                      | 3,80                            | 3,86                             | 3,85                              |
| <b>2,4</b>                      | 4,73                            | 4,76                             | 4,75                              |
| <b>2,5</b>                      | 5,66                            | 5,70                             | 5,68                              |
| <b>2,6</b>                      | 6,60                            | 6,65                             | 6,62                              |
| <b>2,7</b>                      | 7,55                            | 7,58                             | 7,56                              |
| <b>2,8</b>                      | 8,51                            | 8,55                             | 8,51                              |
| <b>2,9</b>                      | 9,47                            | 9,56                             | 9,47                              |
| <b>3,0</b>                      | 10,44                           | 10,52                            | 10,44                             |

Results obtained with straight parallel electrodes considering a distance between them of 8.25 mm (from the positive electrode to the membrane 2.25 mm and from the negative electrode to the membrane 5 mm) at the initial working temperature of 30.1°C).

Current results, for the distance between electrodes of 7.25 millimetres:

| <b>Potential Difference (V)</b> | <b>Experiment I Current (A)</b> | <b>Experiment II Current (A)</b> | <b>Experiment III Current (A)</b> |
|---------------------------------|---------------------------------|----------------------------------|-----------------------------------|
| <b>0,0</b>                      | 0,0                             | 0,0                              | 0,0                               |
| <b>0,5</b>                      | 0,0                             | 0,0                              | 0,0                               |
| <b>1,0</b>                      | 0,0                             | 0,0                              | 0,0                               |
| <b>1,5</b>                      | 0,0                             | 0,0                              | 0,0                               |
| <b>1,7</b>                      | 0,0                             | 0,0                              | 0,0                               |
| <b>1,8</b>                      | 0,29                            | 0,28                             | 0,29                              |
| <b>1,9</b>                      | 0,76                            | 0,76                             | 0,76                              |
| <b>2,0</b>                      | 1,44                            | 1,48                             | 1,45                              |
| <b>2,1</b>                      | 2,25                            | 2,35                             | 2,31                              |
| <b>2,2</b>                      | 3,13                            | 3,29                             | 3,22                              |
| <b>2,3</b>                      | 4,07                            | 4,25                             | 4,19                              |
| <b>2,4</b>                      | 5,03                            | 5,29                             | 5,19                              |
| <b>2,5</b>                      | 6,01                            | 6,33                             | 6,22                              |
| <b>2,6</b>                      | 7,01                            | 7,38                             | 7,25                              |

|            |       |       |       |
|------------|-------|-------|-------|
| <b>2,7</b> | 8,02  | 8,44  | 8,30  |
| <b>2,8</b> | 9,04  | 9,51  | 9,34  |
| <b>2,9</b> | 10,06 | 10,56 | 10,42 |
| <b>3,0</b> | 11,14 | 11,67 | 11,49 |

Results obtained with straight parallel electrodes considering a distance between them of 7.25 mm (from the positive electrode to the membrane 1.8 mm and from the negative electrode to the membrane 4.45 mm) at the initial working temperature of 30.1°C).

Current results, for the distance between electrodes of 6.30 millimetres:

| <b>Potential Difference (V)</b> | <b>Experiment I Current (A)</b> | <b>Experiment II Current (A)</b> | <b>Experiment III Current (A)</b> |
|---------------------------------|---------------------------------|----------------------------------|-----------------------------------|
| <b>0,0</b>                      | 0,0                             | 0,0                              | 0,0                               |
| <b>0,5</b>                      | 0,0                             | 0,0                              | 0,0                               |
| <b>1,0</b>                      | 0,0                             | 0,0                              | 0,0                               |
| <b>1,5</b>                      | 0,0                             | 0,0                              | 0,0                               |
| <b>1,7</b>                      | 0,0                             | 0,0                              | 0,0                               |
| <b>1,8</b>                      | 0,26                            | 0,28                             | 0,31                              |
| <b>1,9</b>                      | 0,72                            | 0,78                             | 0,81                              |
| <b>2,0</b>                      | 1,47                            | 1,51                             | 1,55                              |
| <b>2,1</b>                      | 2,42                            | 2,42                             | 2,46                              |
| <b>2,2</b>                      | 3,43                            | 3,43                             | 3,46                              |
| <b>2,3</b>                      | 4,55                            | 4,50                             | 4,52                              |
| <b>2,4</b>                      | 5,69                            | 5,61                             | 5,62                              |
| <b>2,5</b>                      | 6,86                            | 6,74                             | 6,74                              |
| <b>2,6</b>                      | 8,02                            | 7,88                             | 7,87                              |
| <b>2,7</b>                      | 9,20                            | 9,02                             | 9,01                              |
| <b>2,8</b>                      | 10,35                           | 10,17                            | 10,18                             |
| <b>2,9</b>                      | 11,50                           | 11,29                            | 11,32                             |
| <b>3,0</b>                      | 12,60                           | 12,47                            | 12,47                             |

Results obtained with straight parallel electrodes considering a distance between them of 6.30 mm (from the positive electrode to the membrane 1.8 mm and from the negative electrode to the membrane 3.5 mm) at the initial working temperature of 30.1°C).

Current results, for the distance between electrodes of 6.05 millimetres:

| <b>Potential Difference (V)</b> | <b>Experiment I Current (A)</b> | <b>Experiment II Current (A)</b> | <b>Experiment III Current (A)</b> |
|---------------------------------|---------------------------------|----------------------------------|-----------------------------------|
| <b>0,0</b>                      | 0,0                             | 0,00                             | 0,00                              |
| <b>0,5</b>                      | 0,0                             | 0,00                             | 0,00                              |
| <b>1,0</b>                      | 0,0                             | 0,00                             | 0,00                              |
| <b>1,5</b>                      | 0,0                             | 0,00                             | 0,00                              |
| <b>1,7</b>                      | 0,0                             | 0,00                             | 0,00                              |
| <b>1,8</b>                      | 0,20                            | 0,24                             | 0,26                              |
| <b>1,9</b>                      | 0,63                            | 0,71                             | 0,75                              |
| <b>2,0</b>                      | 1,38                            | 1,46                             | 1,50                              |
| <b>2,1</b>                      | 2,37                            | 2,41                             | 2,43                              |
| <b>2,2</b>                      | 3,49                            | 3,48                             | 3,52                              |
| <b>2,3</b>                      | 4,69                            | 4,64                             | 4,65                              |
| <b>2,4</b>                      | 5,94                            | 5,80                             | 5,83                              |
| <b>2,5</b>                      | 7,22                            | 7,04                             | 7,03                              |
| <b>2,6</b>                      | 8,52                            | 8,27                             | 8,25                              |

|            |       |       |       |
|------------|-------|-------|-------|
| <b>2,7</b> | 9,80  | 9,52  | 9,45  |
| <b>2,8</b> | 11,08 | 10,78 | 10,69 |
| <b>2,9</b> | 12,37 | 12,02 | 11,94 |
| <b>3,0</b> | 13,67 | 13,27 | 13,18 |

Results obtained with straight parallel electrodes considering a distance between them of 6.05 mm (from the positive electrode to the membrane 1.5 mm and from the negative electrode to the membrane 3.55 mm) at the initial working temperature of 30.1°C).

Current results, for the distance between electrodes of 4.35 millimetres:

| <b>Potential Difference (V)</b> | <b>Experiment I Current (A)</b> | <b>Experiment II Current (A)</b> | <b>Experiment III Current (A)</b> | <b>Experiment IV Current (A)</b> |
|---------------------------------|---------------------------------|----------------------------------|-----------------------------------|----------------------------------|
| <b>0,0</b>                      | 0,0                             | 0,0                              | 0,0                               | 0,0                              |
| <b>0,5</b>                      | 0,0                             | 0,0                              | 0,0                               | 0,0                              |
| <b>1,0</b>                      | 0,0                             | 0,0                              | 0,0                               | 0,0                              |
| <b>1,5</b>                      | 0,0                             | 0,0                              | 0,0                               | 0,0                              |
| <b>1,7</b>                      | 0,0                             | 0,0                              | 0,0                               | 0,0                              |
| <b>1,8</b>                      | 0,29                            | 0,27                             | 0,26                              | 0,28                             |
| <b>1,9</b>                      | 0,80                            | 0,72                             | 0,71                              | 0,77                             |
| <b>2,0</b>                      | 1,51                            | 1,41                             | 1,30                              | 1,43                             |
| <b>2,1</b>                      | 2,39                            | 2,23                             | 2,07                              | 2,21                             |
| <b>2,2</b>                      | 3,35                            | 3,14                             | 3,10                              | 3,15                             |
| <b>2,3</b>                      | 4,36                            | 4,10                             | 4,08                              | 4,26                             |
| <b>2,4</b>                      | 5,50                            | 5,14                             | 5,32                              | 5,49                             |
| <b>2,5</b>                      | 6,75                            | 6,32                             | 6,78                              | 6,80                             |
| <b>2,6</b>                      | 8,07                            | 7,62                             | 8,23                              | 8,13                             |
| <b>2,7</b>                      | 9,45                            | 8,93                             | 9,63                              | 9,56                             |
| <b>2,8</b>                      | 10,85                           | 10,28                            | 10,96                             | 10,94                            |
| <b>2,9</b>                      | 12,27                           | 11,63                            | 12,40                             | 12,32                            |
| <b>3,0</b>                      | 13,73                           | 12,97                            | 13,91                             | 13,74                            |

Results obtained with straight parallel electrodes considering a distance between them of 4.35 mm (from the positive electrode to the membrane 0.85 mm and from the negative electrode to the membrane 2.5 mm) at the initial working temperature of 30.1°C).

Current results, for the distance between electrodes of 4.15 millimetres:

| <b>Potential Difference (V)</b> | <b>Experiment I Current (A)</b> | <b>Experiment II Current (A)</b> | <b>Experiment III Current (A)</b> |
|---------------------------------|---------------------------------|----------------------------------|-----------------------------------|
| <b>0,0</b>                      | 0,0                             | 0,0                              | 0,0                               |
| <b>0,5</b>                      | 0,0                             | 0,0                              | 0,0                               |
| <b>1,0</b>                      | 0,0                             | 0,0                              | 0,0                               |
| <b>1,5</b>                      | 0,0                             | 0,0                              | 0,0                               |
| <b>1,7</b>                      | 0,0                             | 0,0                              | 0,0                               |
| <b>1,8</b>                      | 0,29                            | 0,34                             | 0,34                              |
| <b>1,9</b>                      | 0,84                            | 0,92                             | 0,91                              |
| <b>2,0</b>                      | 1,68                            | 1,78                             | 1,79                              |
| <b>2,1</b>                      | 2,71                            | 2,82                             | 2,82                              |
| <b>2,2</b>                      | 3,84                            | 4,01                             | 3,95                              |
| <b>2,3</b>                      | 5,04                            | 5,22                             | 5,11                              |
| <b>2,4</b>                      | 6,22                            | 6,49                             | 6,31                              |
| <b>2,5</b>                      | 7,49                            | 7,74                             | 7,49                              |
| <b>2,6</b>                      | 8,78                            | 9,05                             | 8,78                              |

|            |       |       |       |
|------------|-------|-------|-------|
| <b>2,7</b> | 10,03 | 10,37 | 10,08 |
| <b>2,8</b> | 11,41 | 11,69 | 11,34 |
| <b>2,9</b> | 12,74 | 13,01 | 12,92 |
| <b>3,0</b> | 14,23 | 14,34 | 14,32 |

Results obtained with straight parallel electrodes considering a distance between them of 4.15 mm (from the positive electrode to the membrane 0.7 mm and from the negative electrode to the membrane 2.45 mm) at the initial working temperature of 30.1°C).

Then, the current results are processed, to obtain the current density with the active area of the electrodes.

Current density results, for the distance between electrodes of 10.65 millimetres:

| <b>Potential Difference (V)</b> | <b>Current Density i (mA/cm<sup>2</sup>)</b> | <b>Current Density i (mA/cm<sup>2</sup>)</b> | <b>Current Density i (mA/cm<sup>2</sup>)</b> |
|---------------------------------|----------------------------------------------|----------------------------------------------|----------------------------------------------|
| 0,0                             | 0,0                                          | 0,0                                          | 0,0                                          |
| 0,5                             | 0,0                                          | 0,0                                          | 0,0                                          |
| 1,0                             | 0,0                                          | 0,0                                          | 0,0                                          |
| 1,5                             | 0,0                                          | 0,0                                          | 0,0                                          |
| 1,7                             | 0,0                                          | 0,0                                          | 0,0                                          |
| 1,8                             | 5,7                                          | 6,1                                          | 6,1                                          |
| 1,9                             | 14,5                                         | 14,9                                         | 14,7                                         |
| 2,0                             | 26,9                                         | 26,5                                         | 27,1                                         |
| 2,1                             | 41,6                                         | 40,6                                         | 41,2                                         |
| 2,2                             | 58,0                                         | 55,9                                         | 56,6                                         |
| 2,3                             | 75,1                                         | 71,7                                         | 72,8                                         |
| 2,4                             | 92,7                                         | 87,7                                         | 89,2                                         |
| 2,5                             | 110,6                                        | 104,3                                        | 106,2                                        |
| 2,6                             | 128,9                                        | 121,7                                        | 123,2                                        |
| 2,7                             | 146,8                                        | 139,2                                        | 140,7                                        |
| 2,8                             | 166,1                                        | 156,6                                        | 157,7                                        |
| 2,9                             | 184,8                                        | 174,5                                        | 175,6                                        |
| 3,0                             | 203,7                                        | 192,6                                        | 193,0                                        |

Current density results, for the distance between electrodes of 9.20 millimetres:

| <b>Potential Difference (V)</b> | <b>Current Density i (mA/cm<sup>2</sup>)</b> | <b>Current Density i (mA/cm<sup>2</sup>)</b> | <b>Current Density i (mA/cm<sup>2</sup>)</b> |
|---------------------------------|----------------------------------------------|----------------------------------------------|----------------------------------------------|
| 0,0                             | 0,0                                          | 0,0                                          | 0,0                                          |
| 0,5                             | 0,0                                          | 0,0                                          | 0,0                                          |
| 1,0                             | 0,0                                          | 0,0                                          | 0,0                                          |
| 1,5                             | 0,0                                          | 0,0                                          | 0,0                                          |
| 1,7                             | 0,0                                          | 0,0                                          | 0,0                                          |
| 1,8                             | 5,9                                          | 6,3                                          | 6,1                                          |
| 1,9                             | 14,9                                         | 16,2                                         | 15,3                                         |
| 2,0                             | 27,3                                         | 29,0                                         | 28,6                                         |
| 2,1                             | 42,3                                         | 44,8                                         | 43,5                                         |
| 2,2                             | 58,2                                         | 62,4                                         | 59,5                                         |
| 2,3                             | 75,1                                         | 81,0                                         | 77,4                                         |
| 2,4                             | 92,3                                         | 99,7                                         | 95,2                                         |
| 2,5                             | 110,0                                        | 117,7                                        | 114,2                                        |

|     |       |       |       |
|-----|-------|-------|-------|
| 2,6 | 127,6 | 137,1 | 132,5 |
| 2,7 | 145,7 | 156,2 | 150,8 |
| 2,8 | 163,4 | 176,0 | 169,3 |
| 2,9 | 181,5 | 194,9 | 187,6 |
| 3,0 | 199,7 | 214,3 | 206,3 |

Current density results, for the distance between electrodes of 8.25 millimetres:

| Potential Difference (V) | Current Density i (mA/cm <sup>2</sup> ) | Current Density i (mA/cm <sup>2</sup> ) | Current Density i (mA/cm <sup>2</sup> ) |
|--------------------------|-----------------------------------------|-----------------------------------------|-----------------------------------------|
| 0,0                      | 0,0                                     | 0,0                                     | 0,0                                     |
| 0,5                      | 0,0                                     | 0,0                                     | 0,0                                     |
| 1,0                      | 0,0                                     | 0,0                                     | 0,0                                     |
| 1,5                      | 0,0                                     | 0,0                                     | 0,0                                     |
| 1,7                      | 0,0                                     | 0,0                                     | 0,0                                     |
| 1,8                      | 5,3                                     | 6,1                                     | 6,1                                     |
| 1,9                      | 14,1                                    | 16,2                                    | 15,6                                    |
| 2,0                      | 27,5                                    | 30,3                                    | 29,4                                    |
| 2,1                      | 43,9                                    | 46,5                                    | 45,0                                    |
| 2,2                      | 61,4                                    | 62,9                                    | 62,4                                    |
| 2,3                      | 79,9                                    | 81,2                                    | 81,0                                    |
| 2,4                      | 99,5                                    | 100,1                                   | 99,9                                    |
| 2,5                      | 119,0                                   | 119,8                                   | 119,4                                   |
| 2,6                      | 138,8                                   | 139,8                                   | 139,2                                   |
| 2,7                      | 158,7                                   | 159,4                                   | 159,0                                   |
| 2,8                      | 178,9                                   | 179,8                                   | 178,9                                   |
| 2,9                      | 199,1                                   | 201,0                                   | 199,1                                   |
| 3,0                      | 219,5                                   | 221,2                                   | 219,5                                   |

Current density results, for the distance between electrodes of 7.25 millimetres:

| Potential Difference (V) | Current Density i (mA/cm <sup>2</sup> ) | Current Density i (mA/cm <sup>2</sup> ) | Current Density i (mA/cm <sup>2</sup> ) |
|--------------------------|-----------------------------------------|-----------------------------------------|-----------------------------------------|
| 0,0                      | 0,0                                     | 0,0                                     | 0,0                                     |
| 0,5                      | 0,0                                     | 0,0                                     | 0,0                                     |
| 1,0                      | 0,0                                     | 0,0                                     | 0,0                                     |
| 1,5                      | 0,0                                     | 0,0                                     | 0,0                                     |
| 1,7                      | 0,0                                     | 0,0                                     | 0,0                                     |
| 1,8                      | 5,9                                     | 5,7                                     | 5,9                                     |
| 1,9                      | 15,4                                    | 15,4                                    | 15,4                                    |
| 2,0                      | 29,3                                    | 30,1                                    | 29,5                                    |
| 2,1                      | 45,7                                    | 47,8                                    | 47,0                                    |
| 2,2                      | 63,6                                    | 66,9                                    | 65,4                                    |
| 2,3                      | 82,7                                    | 86,4                                    | 85,2                                    |
| 2,4                      | 102,2                                   | 107,5                                   | 105,5                                   |
| 2,5                      | 122,2                                   | 128,7                                   | 126,4                                   |
| 2,6                      | 142,5                                   | 150,0                                   | 147,4                                   |
| 2,7                      | 163,0                                   | 171,5                                   | 168,7                                   |

|            |       |       |       |
|------------|-------|-------|-------|
| <b>2,8</b> | 183,7 | 193,3 | 189,8 |
| <b>2,9</b> | 204,5 | 214,6 | 211,8 |
| <b>3,0</b> | 226,4 | 237,2 | 233,5 |

Current density results, for the distance between electrodes of 6.30 millimetres:

| <b>Potential Difference (V)</b> | <b>Current Density i (mA/cm<sup>2</sup>)</b> | <b>Current Density i (mA/cm<sup>2</sup>)</b> | <b>Current Density i (mA/cm<sup>2</sup>)</b> |
|---------------------------------|----------------------------------------------|----------------------------------------------|----------------------------------------------|
| <b>0,0</b>                      | 0,0                                          | 0,0                                          | 0,0                                          |
| <b>0,5</b>                      | 0,0                                          | 0,0                                          | 0,0                                          |
| <b>1,0</b>                      | 0,0                                          | 0,0                                          | 0,0                                          |
| <b>1,5</b>                      | 0,0                                          | 0,0                                          | 0,0                                          |
| <b>1,7</b>                      | 0,0                                          | 0,0                                          | 0,0                                          |
| <b>1,8</b>                      | 5,3                                          | 5,7                                          | 6,3                                          |
| <b>1,9</b>                      | 14,6                                         | 15,9                                         | 16,5                                         |
| <b>2,0</b>                      | 29,9                                         | 30,7                                         | 31,5                                         |
| <b>2,1</b>                      | 49,2                                         | 49,2                                         | 50,0                                         |
| <b>2,2</b>                      | 69,7                                         | 69,7                                         | 70,3                                         |
| <b>2,3</b>                      | 92,5                                         | 91,5                                         | 91,9                                         |
| <b>2,4</b>                      | 115,7                                        | 114,0                                        | 114,2                                        |
| <b>2,5</b>                      | 139,4                                        | 137,0                                        | 137,0                                        |
| <b>2,6</b>                      | 163,0                                        | 160,2                                        | 160,0                                        |
| <b>2,7</b>                      | 187,0                                        | 183,3                                        | 183,1                                        |
| <b>2,8</b>                      | 210,4                                        | 206,7                                        | 206,9                                        |
| <b>2,9</b>                      | 233,7                                        | 229,5                                        | 230,1                                        |
| <b>3,0</b>                      | 256,1                                        | 253,5                                        | 253,5                                        |

Current density results, for the distance between electrodes of 6.05 millimetres:

| <b>Potential Difference (V)</b> | <b>Current Density i (mA/cm<sup>2</sup>)</b> | <b>Current Density i (mA/cm<sup>2</sup>)</b> | <b>Current Density i (mA/cm<sup>2</sup>)</b> |
|---------------------------------|----------------------------------------------|----------------------------------------------|----------------------------------------------|
| <b>0,0</b>                      | 0,00                                         | 0,00                                         | 0,00                                         |
| <b>0,5</b>                      | 0,00                                         | 0,00                                         | 0,00                                         |
| <b>1,0</b>                      | 0,00                                         | 0,00                                         | 0,00                                         |
| <b>1,5</b>                      | 0,00                                         | 0,00                                         | 0,00                                         |
| <b>1,7</b>                      | 0,00                                         | 0,00                                         | 0,00                                         |
| <b>1,8</b>                      | 3,93                                         | 4,72                                         | 5,11                                         |
| <b>1,9</b>                      | 12,39                                        | 13,97                                        | 14,75                                        |
| <b>2,0</b>                      | 27,14                                        | 28,72                                        | 29,50                                        |
| <b>2,1</b>                      | 46,62                                        | 47,40                                        | 47,80                                        |
| <b>2,2</b>                      | 68,65                                        | 68,45                                        | 69,24                                        |
| <b>2,3</b>                      | 92,25                                        | 91,27                                        | 91,46                                        |
| <b>2,4</b>                      | 116,84                                       | 114,08                                       | 114,67                                       |
| <b>2,5</b>                      | 142,01                                       | 138,47                                       | 138,28                                       |
| <b>2,6</b>                      | 167,58                                       | 162,67                                       | 162,27                                       |
| <b>2,7</b>                      | 192,76                                       | 187,25                                       | 185,88                                       |

|            |        |        |        |
|------------|--------|--------|--------|
| <b>2,8</b> | 217,94 | 212,04 | 210,27 |
| <b>2,9</b> | 243,31 | 236,43 | 234,85 |
| <b>3,0</b> | 268,88 | 261,01 | 259,24 |

Current density results, for the distance between electrodes of 4.35 millimetres:

| <b>Potential Difference (V)</b> | <b>Current Density i (mA/cm<sup>2</sup>)</b> |
|---------------------------------|----------------------------------------------|----------------------------------------------|----------------------------------------------|----------------------------------------------|
| <b>0,0</b>                      | 0,0                                          | 0,0                                          | 0,0                                          | 0,0                                          |
| <b>0,5</b>                      | 0,0                                          | 0,0                                          | 0,0                                          | 0,0                                          |
| <b>1,0</b>                      | 0,0                                          | 0,0                                          | 0,0                                          | 0,0                                          |
| <b>1,5</b>                      | 0,0                                          | 0,0                                          | 0,0                                          | 0,0                                          |
| <b>1,7</b>                      | 0,0                                          | 0,0                                          | 0,0                                          | 0,0                                          |
| <b>1,8</b>                      | 6,1                                          | 5,7                                          | 5,5                                          | 5,9                                          |
| <b>1,9</b>                      | 16,8                                         | 15,1                                         | 14,9                                         | 16,2                                         |
| <b>2,0</b>                      | 31,7                                         | 29,6                                         | 27,3                                         | 30,1                                         |
| <b>2,1</b>                      | 50,3                                         | 46,9                                         | 43,5                                         | 46,5                                         |
| <b>2,2</b>                      | 70,4                                         | 66,0                                         | 65,2                                         | 66,2                                         |
| <b>2,3</b>                      | 91,7                                         | 86,2                                         | 85,8                                         | 89,6                                         |
| <b>2,4</b>                      | 115,6                                        | 108,1                                        | 111,9                                        | 115,4                                        |
| <b>2,5</b>                      | 141,9                                        | 132,9                                        | 142,6                                        | 143,0                                        |
| <b>2,6</b>                      | 169,7                                        | 160,2                                        | 173,0                                        | 170,9                                        |
| <b>2,7</b>                      | 198,7                                        | 187,8                                        | 202,5                                        | 201,0                                        |
| <b>2,8</b>                      | 228,1                                        | 216,1                                        | 230,4                                        | 230,0                                        |
| <b>2,9</b>                      | 258,0                                        | 244,5                                        | 260,7                                        | 259,0                                        |
| <b>3,0</b>                      | 288,7                                        | 272,7                                        | 292,5                                        | 288,9                                        |

Current density results, for the distance between electrodes of 4.15 millimetres:

| <b>Potential Difference (V)</b> | <b>Current Density i (mA/cm<sup>2</sup>)</b> | <b>Current Density i (mA/cm<sup>2</sup>)</b> | <b>Current Density i (mA/cm<sup>2</sup>)</b> |
|---------------------------------|----------------------------------------------|----------------------------------------------|----------------------------------------------|
| <b>0,0</b>                      | 0,0                                          | 0,0                                          | 0,0                                          |
| <b>0,5</b>                      | 0,0                                          | 0,0                                          | 0,0                                          |
| <b>1,0</b>                      | 0,0                                          | 0,0                                          | 0,0                                          |
| <b>1,5</b>                      | 0,0                                          | 0,0                                          | 0,0                                          |
| <b>1,7</b>                      | 0,0                                          | 0,0                                          | 0,0                                          |
| <b>1,8</b>                      | 6,1                                          | 7,1                                          | 7,1                                          |
| <b>1,9</b>                      | 17,7                                         | 19,3                                         | 19,1                                         |
| <b>2,0</b>                      | 35,3                                         | 37,4                                         | 37,6                                         |
| <b>2,1</b>                      | 57,0                                         | 59,3                                         | 59,3                                         |
| <b>2,2</b>                      | 80,7                                         | 84,3                                         | 83,1                                         |
| <b>2,3</b>                      | 106,0                                        | 109,8                                        | 107,4                                        |
| <b>2,4</b>                      | 130,8                                        | 136,5                                        | 132,7                                        |
| <b>2,5</b>                      | 157,5                                        | 162,7                                        | 157,5                                        |
| <b>2,6</b>                      | 184,6                                        | 190,3                                        | 184,6                                        |
| <b>2,7</b>                      | 210,9                                        | 218,0                                        | 211,9                                        |
| <b>2,8</b>                      | 239,9                                        | 245,8                                        | 238,4                                        |



|            |       |       |       |
|------------|-------|-------|-------|
| <b>2,9</b> | 267,9 | 273,5 | 271,7 |
| <b>3,0</b> | 299,2 | 301,5 | 301,1 |

Finally, for each group of determinations, under the same working conditions, the average, the standard deviation and standard error are calculated.

Average, standard deviation and standard error for a distance between electrodes of 10.65 millimetres:

| <b>Potential Difference<br/>(V)</b> | <b>Average<br/>i (mA/cm<sup>2</sup>)</b> | <b>Standard Deviation</b> | <b>Standard Error</b> |
|-------------------------------------|------------------------------------------|---------------------------|-----------------------|
| 0,0                                 | 0,00                                     | 0,00                      | 0,00                  |
| 0,5                                 | 0,00                                     | 0,00                      | 0,00                  |
| 1,0                                 | 0,00                                     | 0,00                      | 0,00                  |
| 1,5                                 | 0,00                                     | 0,00                      | 0,00                  |
| 1,7                                 | 0,00                                     | 0,00                      | 0,00                  |
| 1,8                                 | 5,96                                     | 0,24                      | 0,14                  |
| 1,9                                 | 14,72                                    | 0,21                      | 0,12                  |
| 2,0                                 | 26,84                                    | 0,32                      | 0,19                  |
| 2,1                                 | 41,14                                    | 0,53                      | 0,31                  |
| 2,2                                 | 56,84                                    | 1,08                      | 0,62                  |
| 2,3                                 | 73,17                                    | 1,72                      | 0,99                  |
| 2,4                                 | 89,85                                    | 2,60                      | 1,50                  |
| 2,5                                 | 107,02                                   | 3,24                      | 1,87                  |
| 2,6                                 | 124,61                                   | 3,77                      | 2,18                  |
| 2,7                                 | 142,21                                   | 4,01                      | 2,32                  |
| 2,8                                 | 160,15                                   | 5,19                      | 2,99                  |
| 2,9                                 | 178,30                                   | 5,67                      | 3,27                  |
| 3,0                                 | 196,45                                   | 6,32                      | 3,65                  |

Average, standard deviation and standard error for a distance between electrodes of 9.20 millimetres:

| <b>Potential Difference<br/>(V)</b> | <b>Average<br/>i (mA/cm<sup>2</sup>)</b> | <b>Standard Deviation</b> | <b>Standard Error</b> |
|-------------------------------------|------------------------------------------|---------------------------|-----------------------|
| 0,0                                 | 0,00                                     | 0,00                      | 0,00                  |
| 0,5                                 | 0,00                                     | 0,00                      | 0,00                  |
| 1,0                                 | 0,00                                     | 0,00                      | 0,00                  |
| 1,5                                 | 0,00                                     | 0,00                      | 0,00                  |
| 1,7                                 | 0,00                                     | 0,00                      | 0,00                  |
| 1,8                                 | 6,10                                     | 0,21                      | 0,12                  |
| 1,9                                 | 15,49                                    | 0,64                      | 0,37                  |
| 2,0                                 | 28,32                                    | 0,88                      | 0,51                  |
| 2,1                                 | 43,52                                    | 1,26                      | 0,73                  |
| 2,2                                 | 60,06                                    | 2,16                      | 1,25                  |
| 2,3                                 | 77,80                                    | 2,97                      | 1,71                  |
| 2,4                                 | 95,74                                    | 3,70                      | 2,14                  |
| 2,5                                 | 113,96                                   | 3,89                      | 2,25                  |
| 2,6                                 | 132,39                                   | 4,73                      | 2,73                  |

|            |        |      |      |
|------------|--------|------|------|
| <b>2,7</b> | 150,90 | 5,26 | 3,04 |
| <b>2,8</b> | 169,54 | 6,31 | 3,64 |
| <b>2,9</b> | 187,97 | 6,74 | 3,89 |
| <b>3,0</b> | 206,76 | 7,27 | 4,20 |

Average, standard deviation and standard error for a distance between electrodes of 8.25 millimetres:

| <b>Potential Difference<br/>(V)</b> | <b>Average<br/>i (mA/cm<sup>2</sup>)</b> | <b>Standard Deviation</b> | <b>Standard Error</b> |
|-------------------------------------|------------------------------------------|---------------------------|-----------------------|
| <b>0,0</b>                          | 0,00                                     | 0,00                      | 0,00                  |
| <b>0,5</b>                          | 0,00                                     | 0,00                      | 0,00                  |
| <b>1,0</b>                          | 0,00                                     | 0,00                      | 0,00                  |
| <b>1,5</b>                          | 0,00                                     | 0,00                      | 0,00                  |
| <b>1,7</b>                          | 0,00                                     | 0,00                      | 0,00                  |
| <b>1,8</b>                          | 5,82                                     | 0,49                      | 0,28                  |
| <b>1,9</b>                          | 15,28                                    | 1,08                      | 0,62                  |
| <b>2,0</b>                          | 29,09                                    | 1,40                      | 0,81                  |
| <b>2,1</b>                          | 45,14                                    | 1,27                      | 0,73                  |
| <b>2,2</b>                          | 62,24                                    | 0,76                      | 0,44                  |
| <b>2,3</b>                          | 80,67                                    | 0,68                      | 0,39                  |
| <b>2,4</b>                          | 99,80                                    | 0,32                      | 0,19                  |
| <b>2,5</b>                          | 119,43                                   | 0,42                      | 0,24                  |
| <b>2,6</b>                          | 139,26                                   | 0,53                      | 0,31                  |
| <b>2,7</b>                          | 159,03                                   | 0,32                      | 0,19                  |
| <b>2,8</b>                          | 179,21                                   | 0,49                      | 0,28                  |
| <b>2,9</b>                          | 199,75                                   | 1,09                      | 0,63                  |
| <b>3,0</b>                          | 220,07                                   | 0,97                      | 0,56                  |

Average, standard deviation and standard error for a distance between electrodes of 7.25 millimetres:

| <b>Potential Difference<br/>(V)</b> | <b>Average<br/>i (mA/cm<sup>2</sup>)</b> | <b>Standard Deviation</b> | <b>Standard Error</b> |
|-------------------------------------|------------------------------------------|---------------------------|-----------------------|
| <b>0,0</b>                          | 0,00                                     | 0,00                      | 0,00                  |
| <b>0,5</b>                          | 0,00                                     | 0,00                      | 0,00                  |
| <b>1,0</b>                          | 0,00                                     | 0,00                      | 0,00                  |
| <b>1,5</b>                          | 0,00                                     | 0,00                      | 0,00                  |
| <b>1,7</b>                          | 0,00                                     | 0,00                      | 0,00                  |
| <b>1,8</b>                          | 5,83                                     | 0,12                      | 0,07                  |
| <b>1,9</b>                          | 15,45                                    | 0,00                      | 0,00                  |
| <b>2,0</b>                          | 29,61                                    | 0,42                      | 0,24                  |
| <b>2,1</b>                          | 46,82                                    | 1,02                      | 0,59                  |
| <b>2,2</b>                          | 65,31                                    | 1,63                      | 0,94                  |
| <b>2,3</b>                          | 84,76                                    | 1,86                      | 1,08                  |
| <b>2,4</b>                          | 105,08                                   | 2,67                      | 1,54                  |
| <b>2,5</b>                          | 125,75                                   | 3,30                      | 1,91                  |
| <b>2,6</b>                          | 146,61                                   | 3,82                      | 2,20                  |

|            |        |      |      |
|------------|--------|------|------|
| <b>2,7</b> | 167,75 | 4,35 | 2,51 |
| <b>2,8</b> | 188,96 | 4,84 | 2,79 |
| <b>2,9</b> | 210,30 | 5,24 | 3,03 |
| <b>3,0</b> | 232,38 | 5,48 | 3,16 |

Average, standard deviation and standard error for a distance between electrodes of 6.30 millimetres:

| <b>Potential Difference (V)</b> | <b>Average i (mA/cm<sup>2</sup>)</b> | <b>Standard Deviation</b> | <b>Standard Error</b> |
|---------------------------------|--------------------------------------|---------------------------|-----------------------|
| <b>0,0</b>                      | 0,00                                 | 0,00                      | 0,00                  |
| <b>0,5</b>                      | 0,00                                 | 0,00                      | 0,00                  |
| <b>1,0</b>                      | 0,00                                 | 0,00                      | 0,00                  |
| <b>1,5</b>                      | 0,00                                 | 0,00                      | 0,00                  |
| <b>1,7</b>                      | 0,00                                 | 0,00                      | 0,00                  |
| <b>1,8</b>                      | 5,76                                 | 0,51                      | 0,30                  |
| <b>1,9</b>                      | 15,65                                | 0,93                      | 0,54                  |
| <b>2,0</b>                      | 30,69                                | 0,81                      | 0,47                  |
| <b>2,1</b>                      | 49,46                                | 0,47                      | 0,27                  |
| <b>2,2</b>                      | 69,92                                | 0,35                      | 0,20                  |
| <b>2,3</b>                      | 91,94                                | 0,51                      | 0,30                  |
| <b>2,4</b>                      | 114,63                               | 0,89                      | 0,51                  |
| <b>2,5</b>                      | 137,80                               | 1,41                      | 0,81                  |
| <b>2,6</b>                      | 161,04                               | 1,70                      | 0,98                  |
| <b>2,7</b>                      | 184,49                               | 2,17                      | 1,25                  |
| <b>2,8</b>                      | 207,99                               | 2,06                      | 1,19                  |
| <b>2,9</b>                      | 231,10                               | 2,31                      | 1,33                  |
| <b>3,0</b>                      | 254,34                               | 1,53                      | 0,88                  |

Average, standard deviation and standard error for a distance between electrodes of 6.05 millimetres:

| <b>Potential Difference (V)</b> | <b>Average i (mA/cm<sup>2</sup>)</b> | <b>Standard Deviation</b> | <b>Standard Error</b> |
|---------------------------------|--------------------------------------|---------------------------|-----------------------|
| <b>0,0</b>                      | 0,00                                 | 0,00                      | 0,00                  |
| <b>0,5</b>                      | 0,00                                 | 0,00                      | 0,00                  |
| <b>1,0</b>                      | 0,00                                 | 0,00                      | 0,00                  |
| <b>1,5</b>                      | 0,00                                 | 0,00                      | 0,00                  |
| <b>1,7</b>                      | 0,00                                 | 0,00                      | 0,00                  |
| <b>1,8</b>                      | 4,59                                 | 0,60                      | 0,35                  |
| <b>1,9</b>                      | 13,70                                | 1,20                      | 0,69                  |
| <b>2,0</b>                      | 28,46                                | 1,20                      | 0,69                  |
| <b>2,1</b>                      | 47,27                                | 0,60                      | 0,35                  |
| <b>2,2</b>                      | 68,78                                | 0,41                      | 0,24                  |
| <b>2,3</b>                      | 91,66                                | 0,52                      | 0,30                  |
| <b>2,4</b>                      | 115,20                               | 1,45                      | 0,84                  |
| <b>2,5</b>                      | 139,59                               | 2,10                      | 1,21                  |
| <b>2,6</b>                      | 164,18                               | 2,96                      | 1,71                  |

|     |        |      |      |
|-----|--------|------|------|
| 2,7 | 188,63 | 3,64 | 2,10 |
| 2,8 | 213,41 | 4,02 | 2,32 |
| 2,9 | 238,20 | 4,50 | 2,60 |
| 3,0 | 263,05 | 5,13 | 2,96 |

Average, standard deviation and standard error for a distance between electrodes of 4.35 millimetres:

| Potential Difference (V) | Average $i$ (mA/cm <sup>2</sup> ) | Standard Deviation | Standard Error |
|--------------------------|-----------------------------------|--------------------|----------------|
| 0,0                      | 0,00                              | 0,0                | 0,00           |
| 0,5                      | 0,00                              | 0,0                | 0,00           |
| 1,0                      | 0,00                              | 0,0                | 0,00           |
| 1,5                      | 0,00                              | 0,0                | 0,00           |
| 1,7                      | 0,00                              | 0,0                | 0,00           |
| 1,8                      | 5,78                              | 0,3                | 0,14           |
| 1,9                      | 15,77                             | 0,9                | 0,45           |
| 2,0                      | 29,70                             | 1,8                | 0,91           |
| 2,1                      | 46,78                             | 2,8                | 1,38           |
| 2,2                      | 66,97                             | 2,4                | 1,18           |
| 2,3                      | 88,31                             | 2,8                | 1,41           |
| 2,4                      | 112,75                            | 3,6                | 1,78           |
| 2,5                      | 140,09                            | 4,8                | 2,41           |
| 2,6                      | 168,47                            | 5,7                | 2,84           |
| 2,7                      | 197,49                            | 6,7                | 3,33           |
| 2,8                      | 226,19                            | 6,8                | 3,38           |
| 2,9                      | 255,57                            | 7,4                | 3,72           |
| 3,0                      | 285,69                            | 8,8                | 4,41           |

Average, standard deviation and standard error for a distance between electrodes of 4.15 millimetres:

| Potential Difference (V) | Average $i$ (mA/cm <sup>2</sup> ) | Standard Deviation | Standard Error |
|--------------------------|-----------------------------------|--------------------|----------------|
| 0,0                      | 0,00                              | 0,00               | 0,00           |
| 0,5                      | 0,00                              | 0,00               | 0,00           |
| 1,0                      | 0,00                              | 0,00               | 0,00           |
| 1,5                      | 0,00                              | 0,00               | 0,00           |
| 1,7                      | 0,00                              | 0,00               | 0,00           |
| 1,8                      | 6,80                              | 0,61               | 0,35           |
| 1,9                      | 18,71                             | 0,92               | 0,53           |
| 2,0                      | 36,80                             | 1,28               | 0,74           |
| 2,1                      | 58,52                             | 1,34               | 0,77           |
| 2,2                      | 82,70                             | 1,81               | 1,05           |
| 2,3                      | 107,72                            | 1,91               | 1,10           |
| 2,4                      | 133,31                            | 2,89               | 1,67           |
| 2,5                      | 159,24                            | 3,03               | 1,75           |
| 2,6                      | 186,50                            | 3,28               | 1,89           |

|            |        |      |      |
|------------|--------|------|------|
| <b>2,7</b> | 213,62 | 3,86 | 2,23 |
| <b>2,8</b> | 241,38 | 3,89 | 2,25 |
| <b>2,9</b> | 271,03 | 2,89 | 1,67 |
| <b>3,0</b> | 300,60 | 1,23 | 0,71 |
